# Supplementary material for: A 13C and 1H NMR spectroscopic investigation of the structure of the iminium ion with a dipolar form in metal complexes of 2-N-substituted N-confused porphyrins
Source: Royal Society of Chemistry journal article supplement (doi:10.1039/c2dt31426f), 2012-01-01
Supplement: c2dt31426f.pdf [file c2dt31426f.pdf]

**Electronic supplementary information (ESI)**

**( 11 pages)**

**$^{13}\text{C}$  and  $^1\text{H}$  NMR spectroscopic investigation on the structure of the iminium ion with a dipolar form in metal complexes of 2-N substituted N-confused porphyrins**

**Wen- Pin Chang,<sup>a</sup> Wen-Chain Lin,<sup>a</sup> Jyh-Horung Chen,<sup>\*a</sup> Shin-Shin Wang,<sup>b</sup> and Jo-Yu Tung<sup>c</sup>**

<sup>a</sup>*Department of Chemistry, National Chung Hsing University, Taichung 40227, Taiwan. Fax: 886422862547; Tel: 886422840412x612; E-mail:*

*[JyhHChen@dragon.nchu.edu.tw](mailto:JyhHChen@dragon.nchu.edu.tw)*

<sup>b</sup>*Material Chemical Laboratories ITRI, Hsin-Chu 300, Taiwan. Tel: 88635732550; E-mail: ShinShinWang@ITRI.org.tw*

<sup>c</sup>*Department of Occupational Safety and Health, Chung Hwai University of Medical Technology, Taiwan. Fax: 88662894028; Tel: 88662674567x815; E-mail: joyuting@mail.hwai.edu.tw*

## Contents

1. Figure S1. Molecular configuration and atom-labeling scheme for (a) 2-NCH<sub>2</sub>CH<sub>2</sub>CH<sub>2</sub>OC<sub>6</sub>H<sub>5</sub>NCTPPH (**2**) and (b) Ni(2-NCH<sub>2</sub>CH<sub>2</sub>CH<sub>2</sub>OC<sub>6</sub>H<sub>5</sub>NCTPP) (**7**).
2. Figure S2. Molecular configuration and atom-labeling scheme for (a) Zn(2-NCH<sub>2</sub>COOC<sub>2</sub>H<sub>5</sub>NCTPP)Cl (**4**) and (b) Zn(2-NCH<sub>2</sub>COOCH<sub>3</sub>NCTPP)Cl (**8**).
3. Figure S3. Molecular configuration and atom-labeling scheme for (a) Pd(2-NCH<sub>2</sub>COOC<sub>2</sub>H<sub>5</sub>NCTPP) (**5**) and (b) Mn(2-NCH<sub>2</sub>COOC<sub>2</sub>H<sub>5</sub>NCTPP)Br (**6**).
4. Figure S4. <sup>1</sup>H NMR spectra for **8** at 599.95 MHz in CDCl<sub>3</sub> at 20°C.
5. The description for the <sup>1</sup>H NMR of H<sub>β</sub> in **8**.
6. Figure S5. <sup>1</sup>H NMR spectra for **7** at 599.95 MHz in CDCl<sub>3</sub> at 20°C.
7. The description for the <sup>1</sup>H NMR of H<sub>β</sub> in **7**.
8. Figure S6. The UV/vis spectrum of Ni(2-NCH<sub>2</sub>CH<sub>2</sub>CH<sub>2</sub>OC<sub>6</sub>H<sub>5</sub>NCTPP) (**7**).
9. Figure S7. The UV/vis spectra of (a) Zn(2-NCH<sub>2</sub>COOC<sub>2</sub>H<sub>5</sub>NCTPP)Cl (**4**) and (b) Zn(2-NCH<sub>2</sub>COOCH<sub>3</sub>NCTPP)Cl (**8**).
10. Figure S8. The UV/vis spectra of (a) Pd(2-NCH<sub>2</sub>COOC<sub>2</sub>H<sub>5</sub>NCTPP) (**5**) and (b) Mn(2-NCH<sub>2</sub>COOC<sub>2</sub>H<sub>5</sub>NCTPP)Br (**6**).

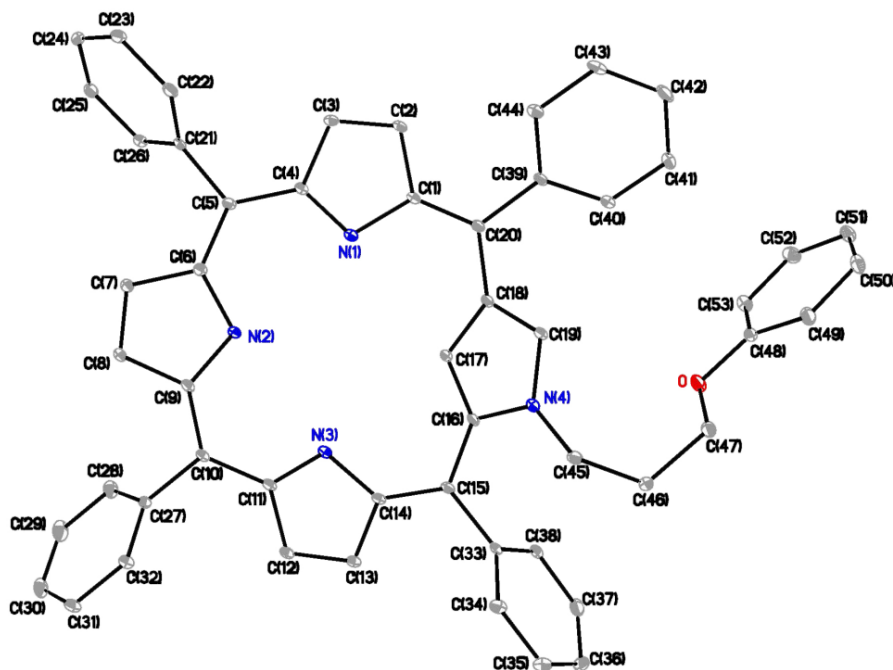

(a) (2)

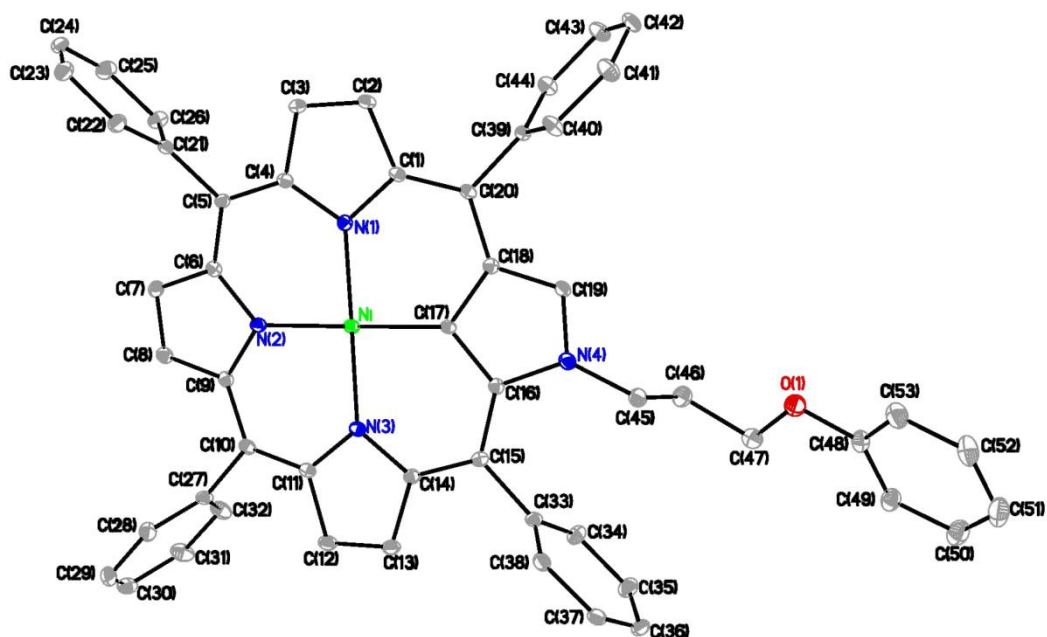

(b) (7)

Figure S1. Molecular configuration and atom-labeling scheme for (a) 2-NCH<sub>2</sub>CH<sub>2</sub>CH<sub>2</sub>OC<sub>6</sub>H<sub>5</sub>NCTPPH (**2**) and (b) Ni(2-NCH<sub>2</sub>CH<sub>2</sub>CH<sub>2</sub>OC<sub>6</sub>H<sub>5</sub>NCTPP) (**7**), with 30% thermal ellipsoids. Hydrogen atoms are omitted for clarity.

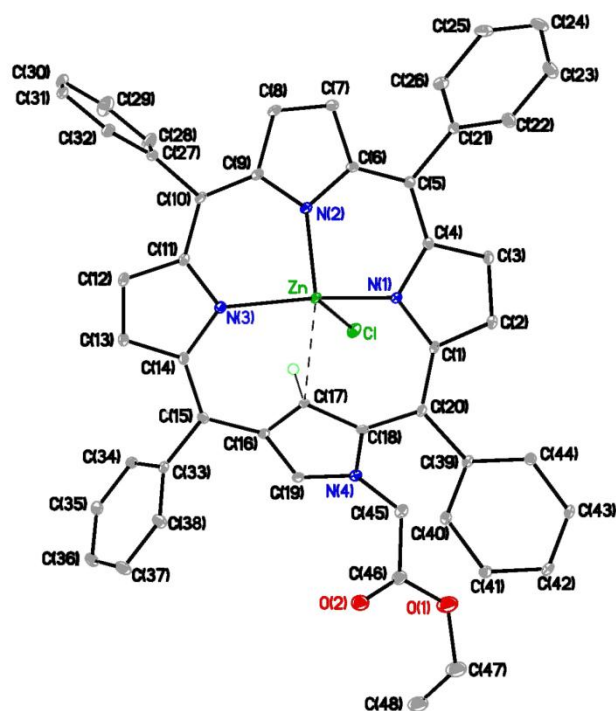

(a) (**4**)

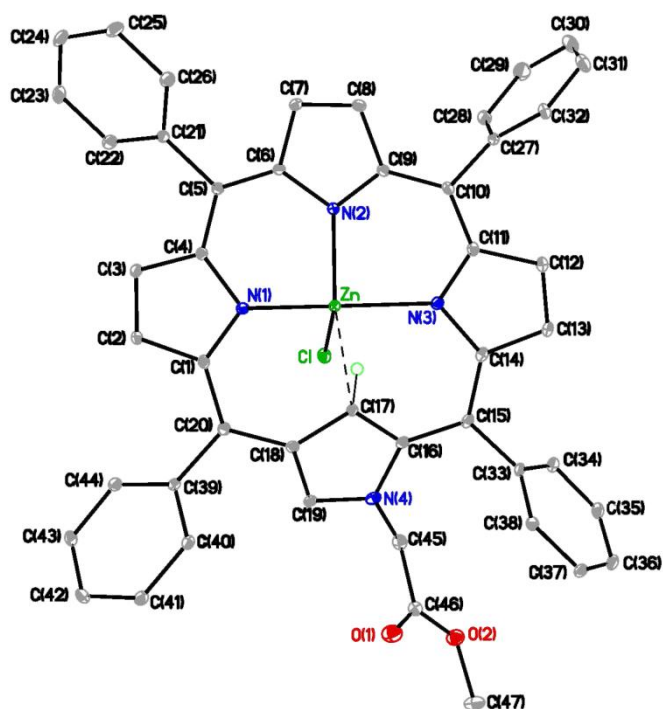

(b) (**8**)

Figure S2. Molecular configuration and atom-labeling scheme for (a) Zn(2-N-CH<sub>2</sub>COOC<sub>2</sub>H<sub>5</sub>NCTPP)Cl (**4**) and (b) Zn(2-N-CH<sub>2</sub>COOCH<sub>3</sub>NCTPP)Cl (**8**), with 30% thermal ellipsoids. Hydrogen atoms except H(17A) for **4** and **8** are omitted for clarity.

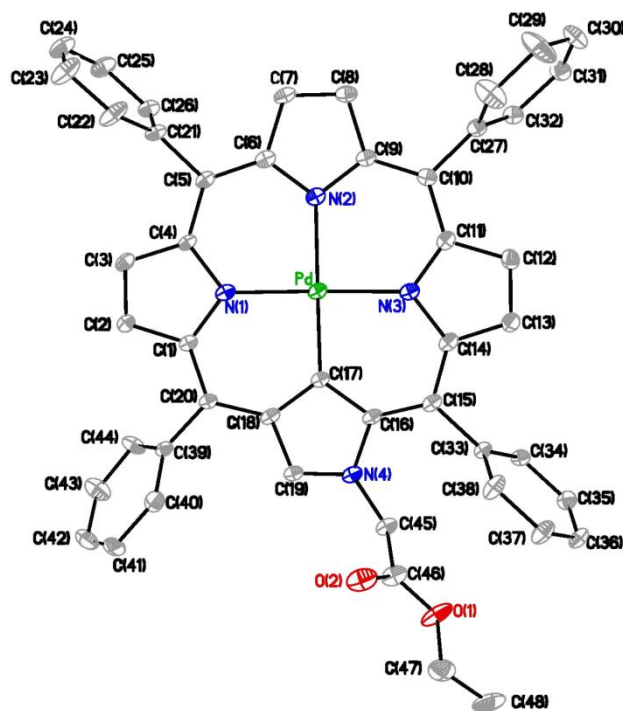

(a) (5)

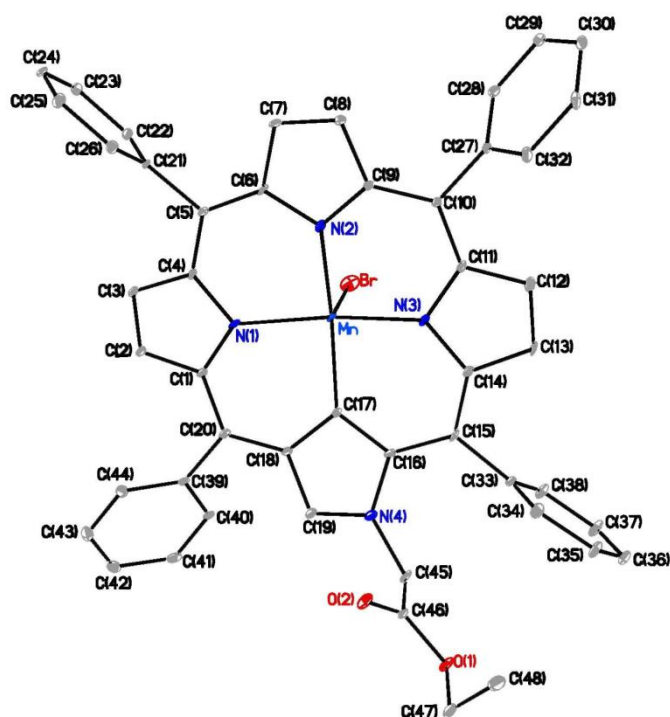

(b) (6)

Figure S3. Molecular configuration and atom-labeling scheme for (a) Pd(2-NCH<sub>2</sub>COOC<sub>2</sub>H<sub>5</sub>NCTPP) (5) and (b) Mn(2-NCH<sub>2</sub>COOC<sub>2</sub>H<sub>5</sub>NCTPP)Br (6), with 30% thermal ellipsoids. Hydrogen atoms are omitted for clarity.

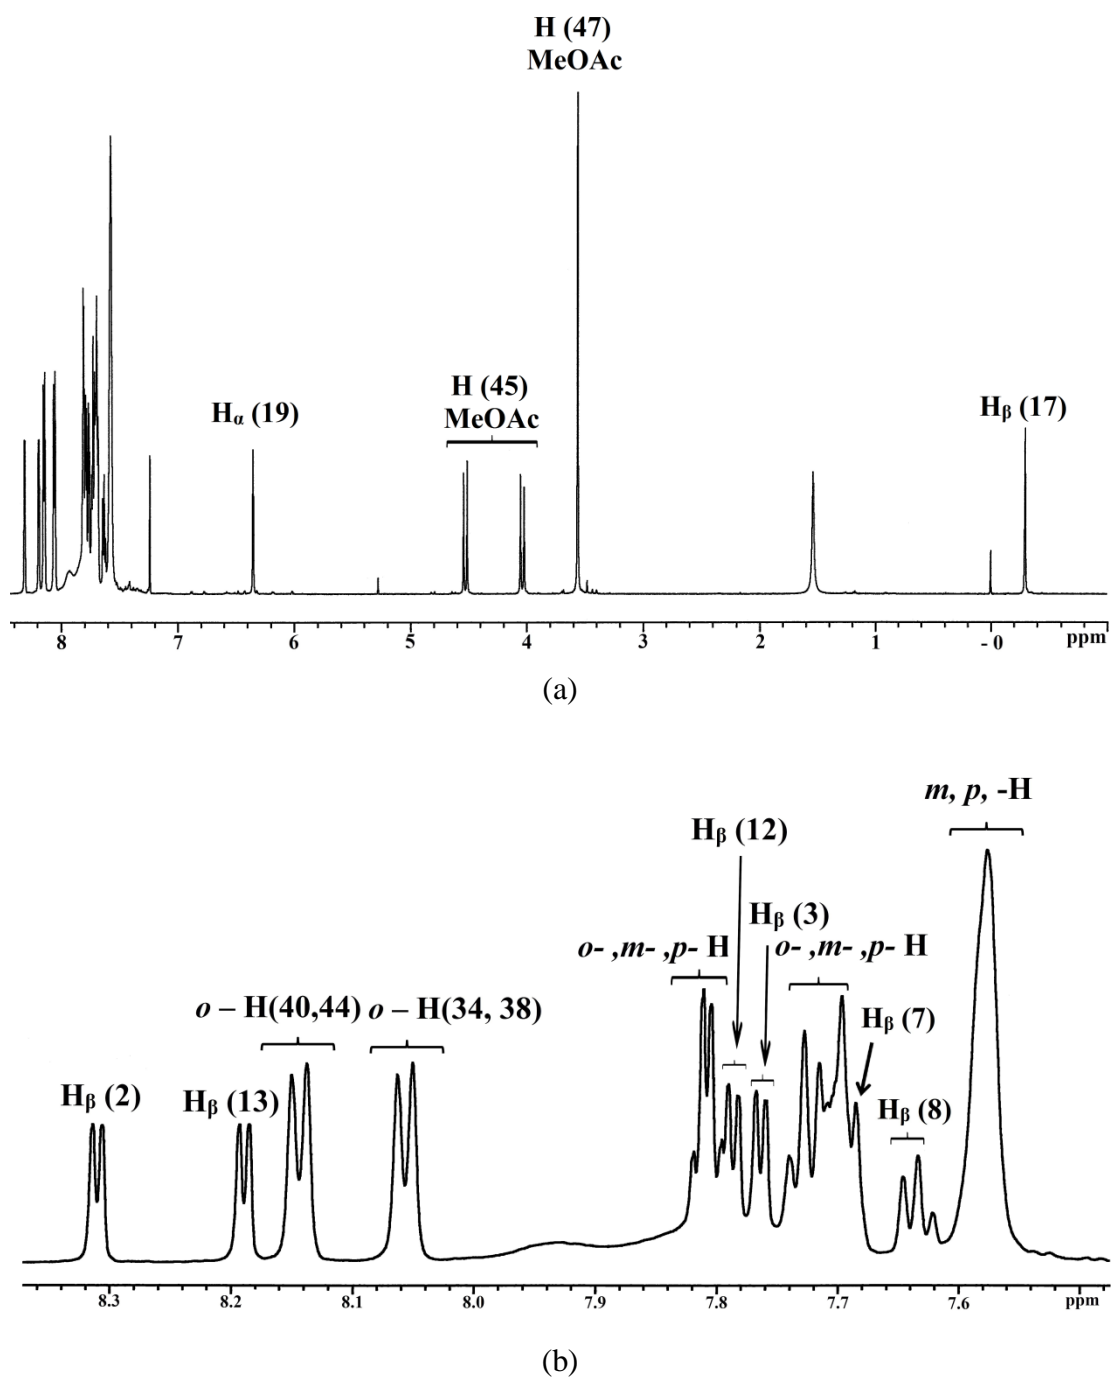

Figure S4.  $^1\text{H}$  NMR spectra for **8** at 599.95 MHz in  $\text{CDCl}_3$  at 20 °C :  
(a) entire spectrum; (b) expansion of the region 7.50-8.30 ppm in (a) showing seven different  $\beta$ -pyrrole protons  $\text{H}_\beta$  and phenyl protons ( $o\text{-H}$ ,  $m$ ,  $p\text{-H}$ ). Chemical shifts are in ppm from  $\text{CDCl}_3$  at 7.24 ppm.

**The description for the  $^1\text{H}$  NMR of  $\text{H}_\beta$  in 8.**

The doublet at 8.30 ppm is assigned to  $\text{H}_\beta(2)$  with  $^3J(\text{H-H}) = 4.5$  Hz and the other doublet at 7.76 ppm is due to  $\text{H}_\beta(3)$  with  $^3J(\text{H-H}) = 4.5$  Hz. The doublet at 8.19 ppm is assigned to  $\text{H}_\beta(13)$  with  $^3J(\text{H-H}) = 4.8$  Hz and the other doublet at 7.78 ppm is due to  $\text{H}_\beta(12)$  with  $^3J(\text{H-H}) = 4.8$  Hz. The doublet at 7.69 ppm is assigned to  $\text{H}_\beta(7)$  with  $^3J(\text{H-H}) = 5.7$  Hz and the other doublet at 7.62 ppm is due to  $\text{H}_\beta(8)$  with  $^3J(\text{H-H}) = 5.7$  Hz.

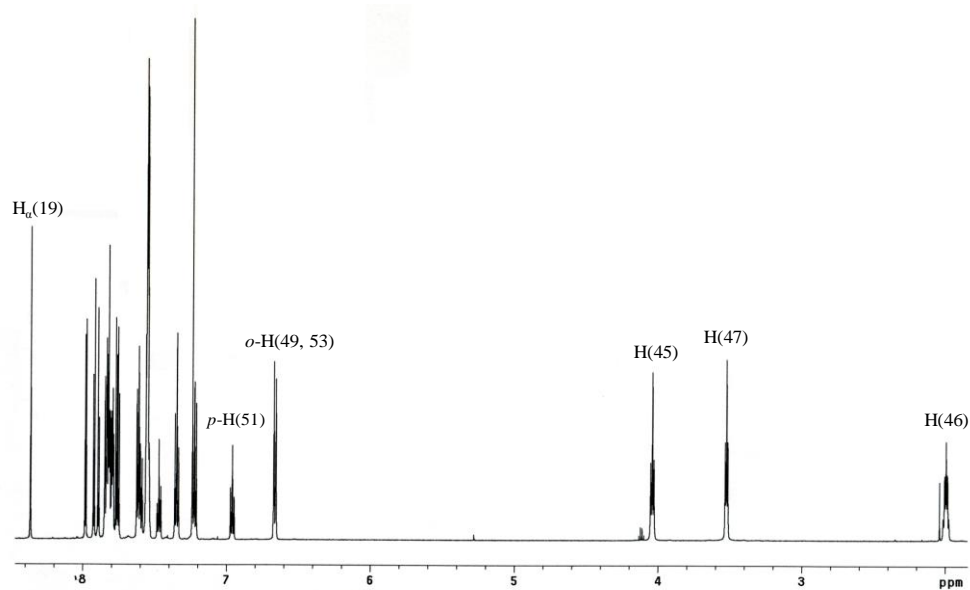

(a)

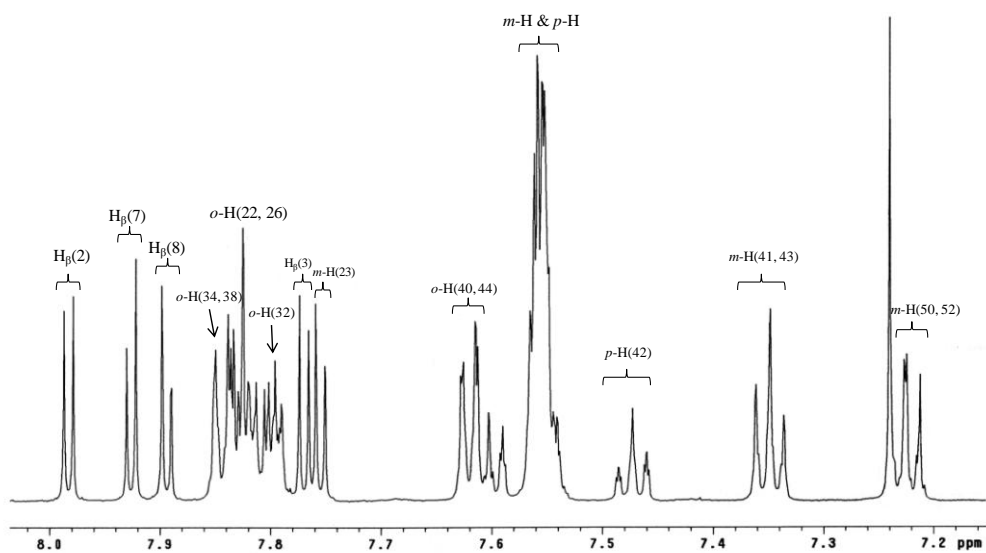

(b)

Figure S5.  $^1\text{H}$  NMR spectra of **7** at 599.94 MHz in  $\text{CDCl}_3$  at 20 °C  
(a) entire spectrum; (b) expansion of the region 7.20-8.00 ppm in (a)  
showing  $\beta$ -pyrrole protons  $\text{H}_\beta$  and phenyl protons (*o*-H, *m*, *p*-H)



**The description for the  $^1\text{H}$  NMR of  $\text{H}_\beta$  in 7.**

The doublet at 7.99 ppm is assigned to  $\text{H}_\beta(2)$  with  $^3J(\text{H-H}) = 4.8$  Hz and the other doublet at 7.77 ppm is due to  $\text{H}_\beta(3)$  with  $^3J(\text{H-H}) = 4.8$  Hz. The doublet at 7.93 ppm is assigned to  $\text{H}_\beta(7)$  with  $^3J(\text{H-H}) = 5.1$  Hz and the other doublet at 7.89 ppm is due to  $\text{H}_\beta(8)$  with  $^3J(\text{H-H}) = 5.1$  Hz.

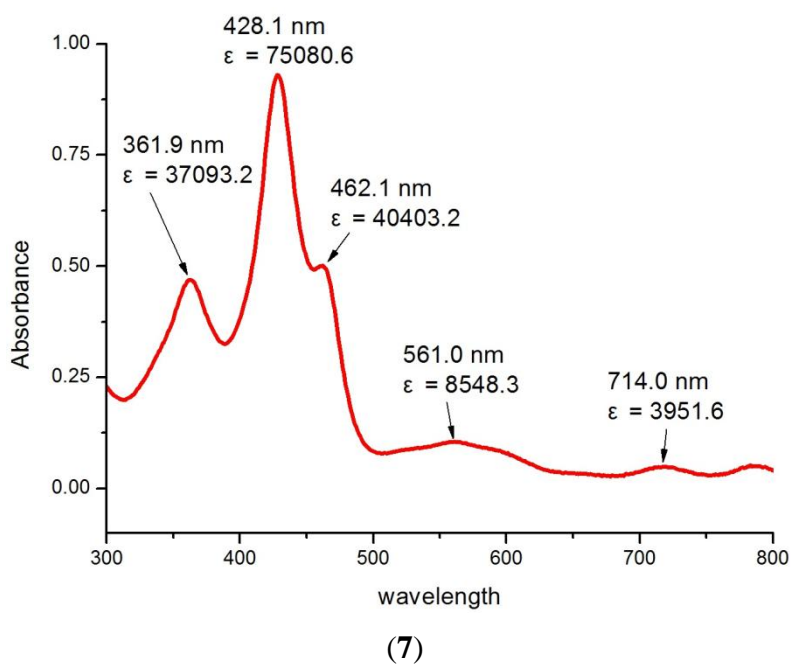

Figure S6. The UV/vis spectrum of Ni(2-NCH<sub>2</sub>CH<sub>2</sub>CH<sub>2</sub>OC<sub>6</sub>H<sub>5</sub>NCTPP) (7) in CH<sub>2</sub>Cl<sub>2</sub> at 20 °C.

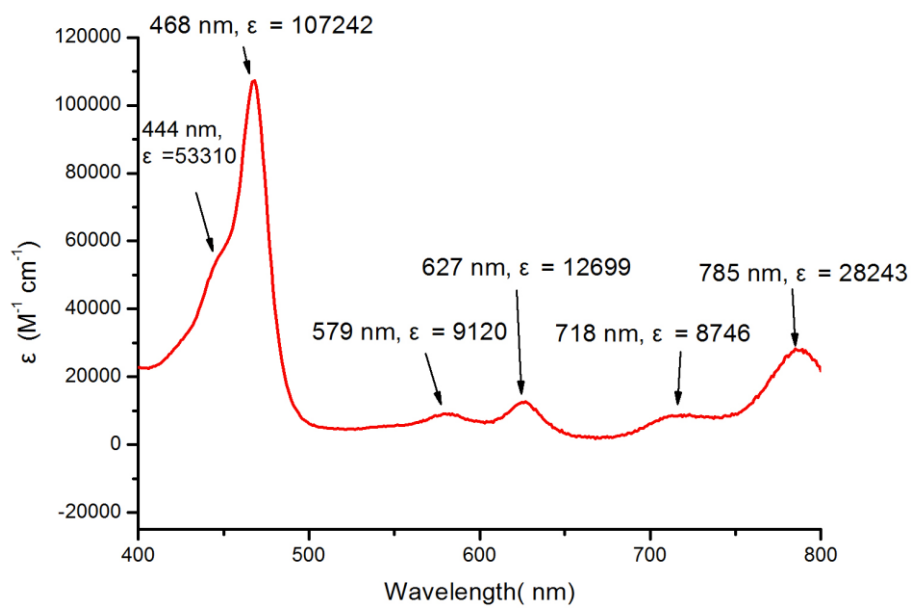

(a) (**4**)

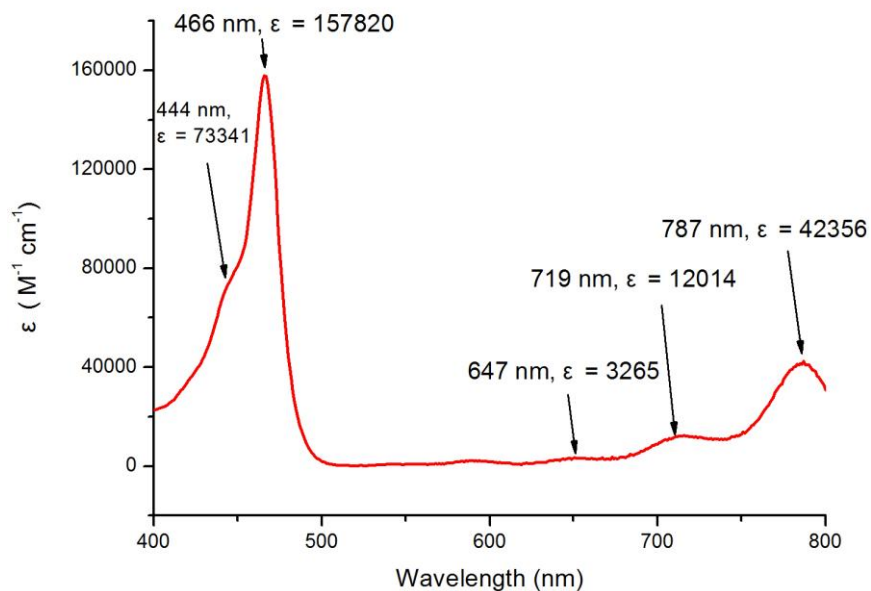

(b) (**8**)

Figure S7. The UV/vis spectra of (a) Zn(2-NCH<sub>2</sub>COOC<sub>2</sub>H<sub>5</sub>NCTPP)Cl (**4**) and (b) Zn(2-NCH<sub>2</sub>COOCH<sub>3</sub>NCTPP)Cl (**8**) in CH<sub>2</sub>Cl<sub>2</sub> at 20 °C.

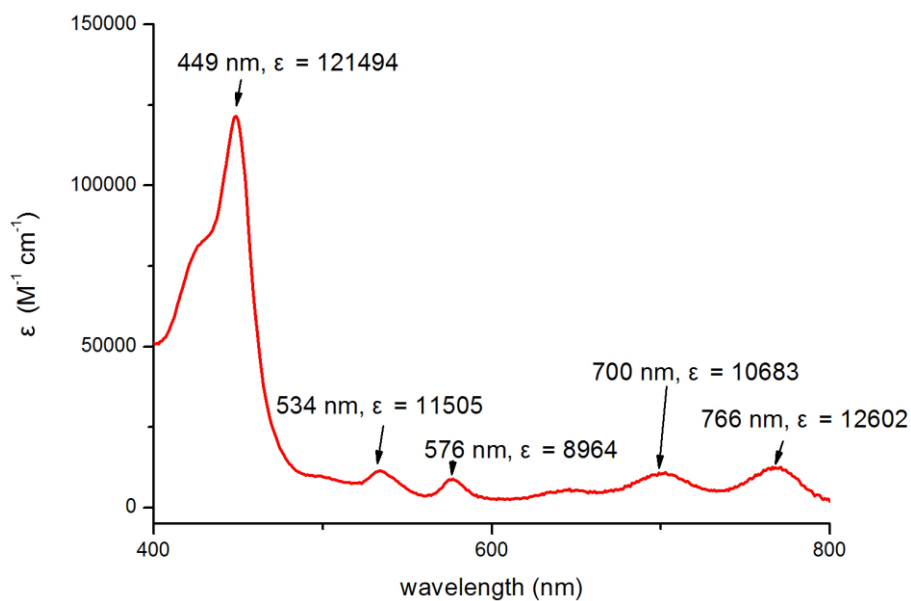

(a) (5)

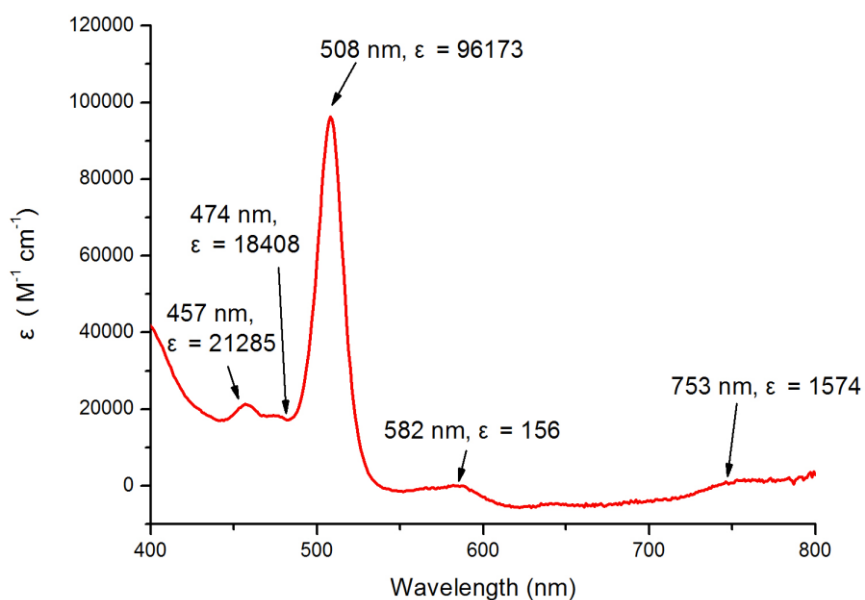

(b) (6)

Figure S8. The UV/vis spectra of (a) Pd(2-NCH<sub>2</sub>COOC<sub>2</sub>H<sub>5</sub>NCTPP) (5) and (b) Mn(2-NCH<sub>2</sub>COOC<sub>2</sub>H<sub>5</sub>NCTPP)Br (6) in CH<sub>2</sub>Cl<sub>2</sub> at 20 °C.
